# Supplementary material for: Efficient one-pot synthesis of alkyl levulinate from xylose with an integrated dehydration/transfer-hydrogenation/alcoholysis process
Source: Royal Society of Chemistry journal article supplement (doi:10.1039/c9se00982e), 2019-12-18
Supplement: c9se00982e1.pdf [file c9se00982e1.pdf]

## **Efficient one-pot synthesis of alkyl levulinate from xylose with an integrated dehydration/transfer-hydrogenation/alcoholysis process**

Mengmeng Wang<sup>a</sup>, Lincai Peng<sup>a,b,\*</sup>, Xueying Gao<sup>a</sup>, Liang He<sup>a</sup>, Junhua Zhang<sup>a</sup>

<sup>a</sup>BiomassChem Group, Faculty of Chemical Engineering, Kunming University of Science and Technology, Kunming, 650500, Yunnan, China

<sup>b</sup>Yunnan Provincial Key Laboratory of Energy Saving in Phosphorus Chemical Engineering and New Phosphorous Materials, Kunming University of Science and Technology, Kunming, 650500, Yunnan, China

\*Corresponding author. E-mail address: penglincai@kust.edu.cn (L. Peng).

**SUPPORTING  
INFORMATION**

## **Table of Contents:**

**Fig. S1.** GC spectrum of the typical sample that was obtained from the conversion of xylose in 2-BuOH with the combination of Zr(20)-MCM-41 and HPW.

**Fig. S2.** MS spectra of FF (a), FA (b), GVL (c), 2-BFE (d), and 2-BL (e).

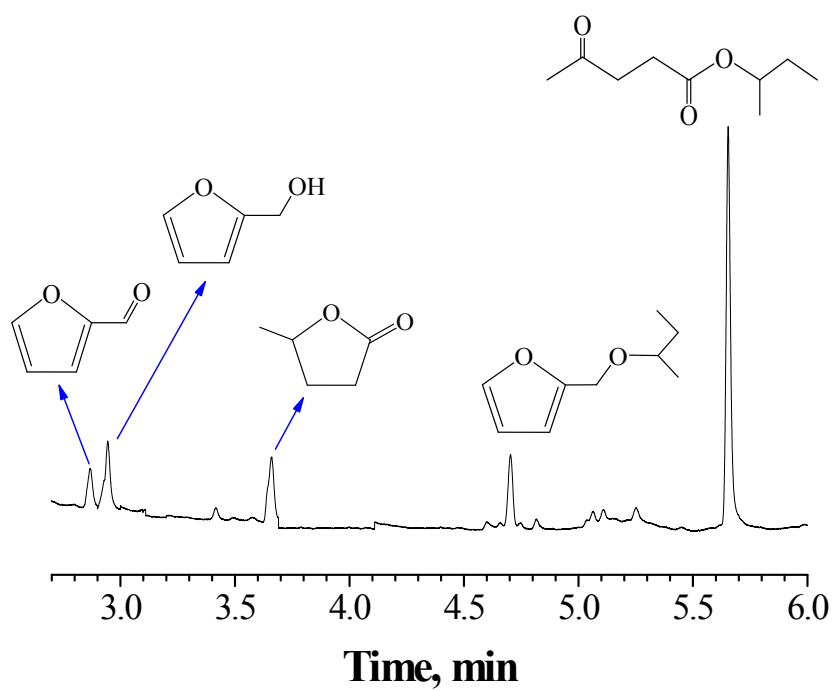

**Fig. S1.** GC spectrum of the typical sample that was obtained from the conversion of xylose in 2-BuOH with the combination of Zr(20)-MCM-41 and HPW.

(a)

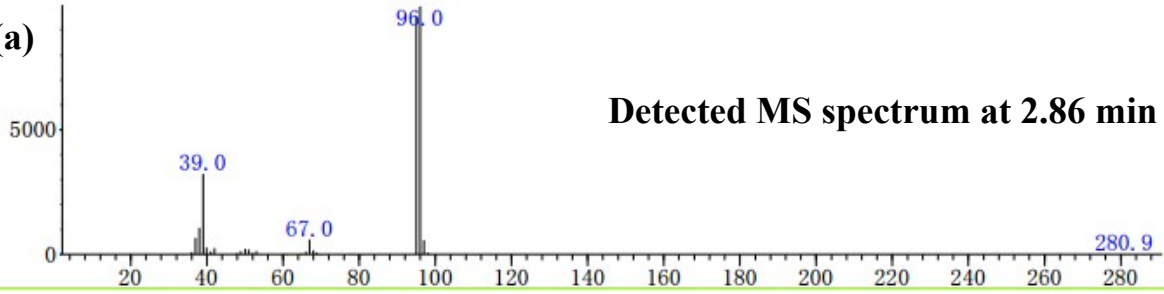

Standard MS spectrum of FF

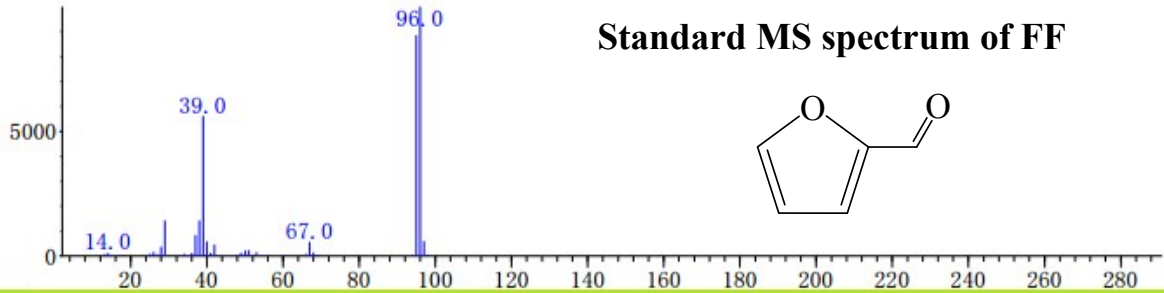

(b)

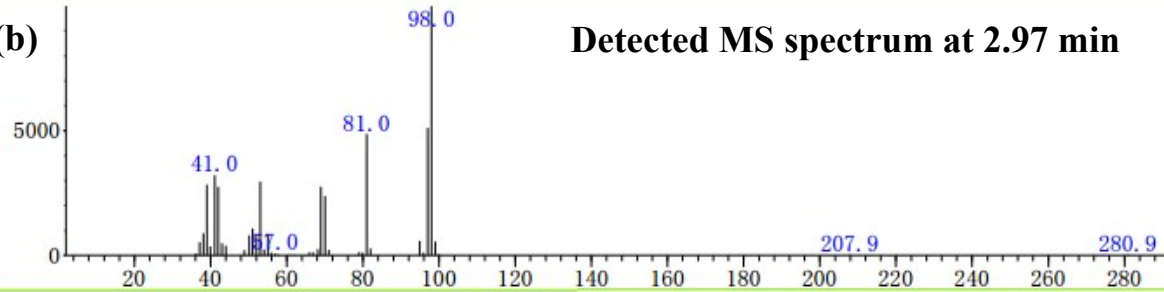

Standard MS spectrum of FA

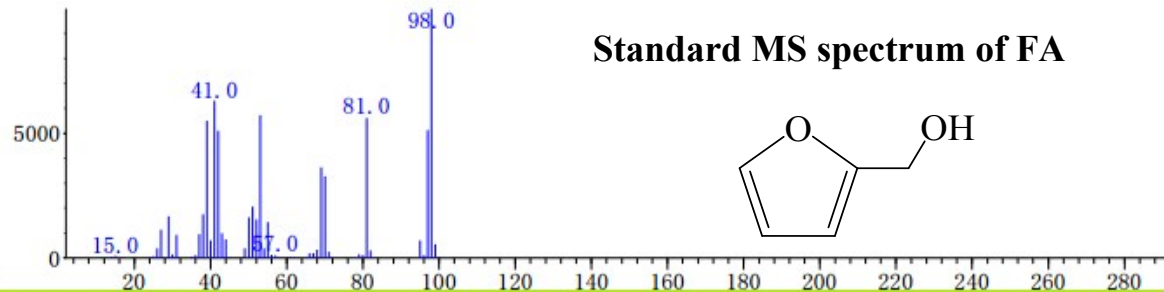

(c)

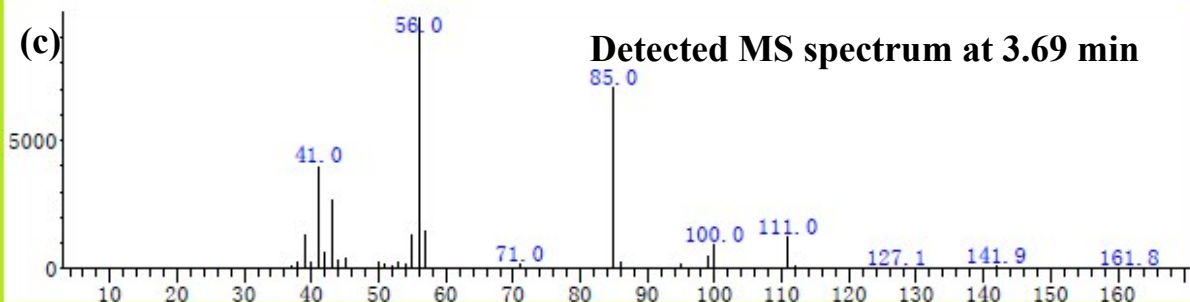

Standard MS spectrum of GVL

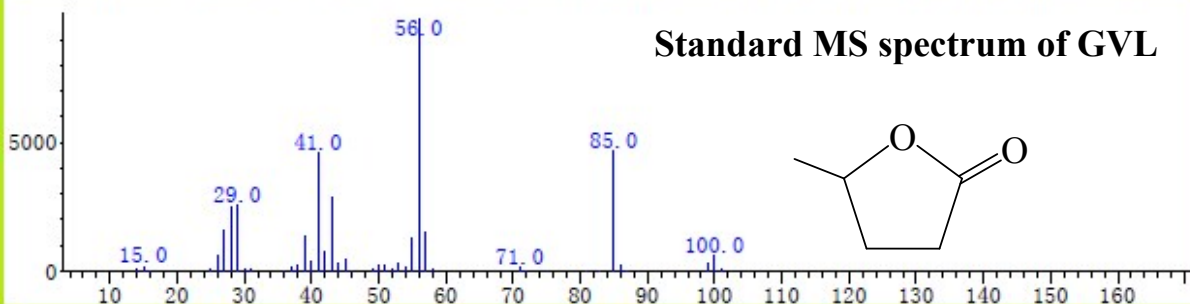

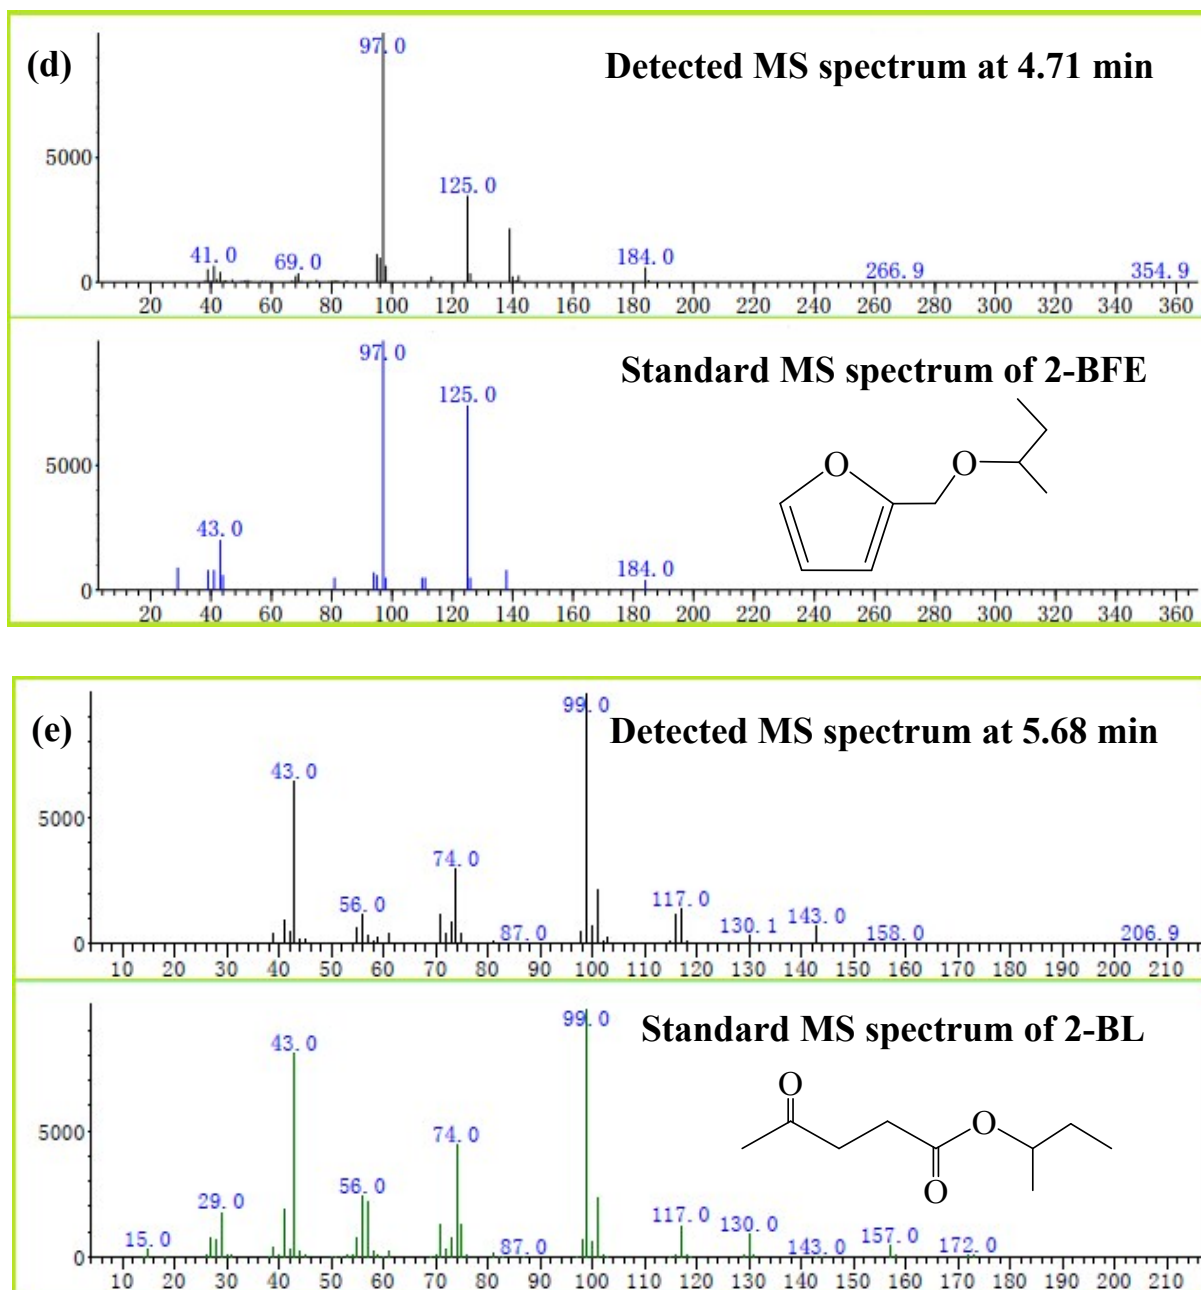

**Fig. S2.** MS spectra of FF (a), FA (b), GVL (c), 2-BFE (d), and 2-BL (e).

Abbreviations: FF = furfural, FA = furfuryl alcohol, GVL =  $\gamma$ -valerolactone, 2-BFE = 2-butyl furfuryl ether, 2-BL = 2-butyl levulinate.
